# Supplementary material for: Chagas Disease-Related Mortality in Spain, 1997 to 2018
Source: MDPI journal article supplement (doi:10.3390/microorganisms9091991), 2021-09-20
Supplement: s1 [file s1]

**Table S1.** Included codes of the International Classification of Diseases-Ninth Revision, Clinical Modification (ICD-9-CM) and ICD-10-CM

| <b>Chagas diseases</b>                                            | <b>ICD-9-CM</b> | <b>ICD-10-CM</b> |
|-------------------------------------------------------------------|-----------------|------------------|
| Trypanosomiasis                                                   | 086             |                  |
| Chagas disease of heart                                           | 086.0           |                  |
| Chagas disease of other organ                                     | 086.1           |                  |
| Chagas disease unspecified                                        | 086.2           |                  |
| Trypanosomiasis unspecified                                       | 086.9           |                  |
| Chagas disease                                                    |                 | B57              |
| Chagas disease acute with involvement of heart                    |                 | B57.0            |
| Acute Chagas disease with heart implications                      |                 | B57.1            |
| Chronic hearth diseases with heart implications                   |                 | B57.2            |
| Chronic Chagas disease with implication of digestive tract        |                 | B57.3            |
| Chronic Chagas disease with involvement of central nervous system |                 | B57.4            |
| Chronic Chagas disease with other organism affected               |                 | B57.5            |
| <b>Comorbidities</b>                                              |                 |                  |
| Diabetes mellitus                                                 | 250             | E08 – E13        |
| Heart failure                                                     | 428             | I50              |
| Ischemic cardiopathy                                              | 410-414         | I20 – I25        |
| Cerebrovascular diseases                                          | 430-438         | I60 – I69        |
| Chronic lung diseases                                             | 490 – 496       | J40 – J47        |
| Chronic kidney failure                                            | 585             | N18              |
| Neoplasms                                                         | 140-239         | C00 – C96        |
| Lymphoma/leukemia                                                 | 200 - 208       | C81 – C96        |
| Human immunodeficiency virus (HIV)                                | 042, 079.53     | B20              |

**Table S2.** Case fatality rate (CFR) in hospitalized patients in Spain with and without Chagas disease, by age

| Age             | Chagas disease        |                      |      | Non-Chagas disease        |                      |      | Difference (95% CI)* |
|-----------------|-----------------------|----------------------|------|---------------------------|----------------------|------|----------------------|
|                 | N deaths /<br>N cases | % of total<br>deaths | CFR  | N deaths /<br>N cases     | % of total<br>deaths | CFR  |                      |
| 0-9 years       | 2/149                 | 3.6                  | 1.3  | 59,421/<br>6371,554       | 1.9                  | 0.9  | 0.4 (−0.5, 3.8)      |
| 10-19 years     | 1/50                  | 1.8                  | 2.0  | 9368/<br>5,711,142        | 0.3                  | 0.2  | 1.8 (0.9, 10.3)      |
| 20-29 years     | 2/699                 | 3.6                  | 0.3  | 19,816/<br>6,652,099      | 0.6                  | 0.3  | 0.0 (−0.8, 0.2)      |
| 30-39 years     | 7/1888                | 12.5                 | 0.4  | 44,517/<br>9,977,510      | 1.4                  | 0.4  | 0.0 (−0.3, 0.2)      |
| 40-49 years     | 8/1086                | 14.3                 | 0.7  | 112,136/<br>6,865,029     | 3.5                  | 1.6  | −0.9 (−1.9, −1.3)    |
| 50-59 years     | 12/684                | 21.4                 | 1.8  | 237,046/<br>8,236,456     | 7.5                  | 2.9  | −1.1 (−1.8, −0.1)    |
| 60-69 years     | 11/340                | 19.6                 | 3.2  | 441,989/<br>10,876,641    | 13.9                 | 4.1  | −0.8 (−1.6, −0.2)    |
| 70-79 years     | 7/89                  | 12.5                 | 7.9  | 835,545/<br>13,713,748    | 26.4                 | 6.1  | 1.8 (−2.2, 9.2)      |
| 80-89 years     | 5/30                  | 8.9                  | 16.7 | 1,067,728 /<br>10,171,384 | 33.7                 | 10.5 | 6.1 (−3.1, 23)       |
| 90-100<br>years | 1/7                   | 1.8                  | 14.3 | 371,125/<br>2,137,996     | 11.7                 | 17.4 | −3.1 (−33, 14)       |
| Total           | 56/5022               | 1.1                  | 100  | 3,170,961 /<br>77,729,072 | 100                  | 4.1  | −2.9 (−2.6, −3.2)    |

\*Differences: CFR for Chagas patients minus CFR for non-Chagas patients

**Table S3.** Characteristics of patients whose deaths were directly related to Chagas disease

| N | Age /Sex | Year | Country of birth | Diagnoses (main diagnosis in bold) <sup>a</sup>                                                                                                                                                                                                                                                                                                                                                                                   | Length of admission, days |
|---|----------|------|------------------|-----------------------------------------------------------------------------------------------------------------------------------------------------------------------------------------------------------------------------------------------------------------------------------------------------------------------------------------------------------------------------------------------------------------------------------|---------------------------|
| 1 | 60/F     | 2007 | NA               | <b>Cardiac arrest</b><br>Chagas disease with heart involvement<br>Diseases of the tricuspid valve<br>Other non-infectious gastroenteritis/colitis<br>Nephrotic syndrome with proliferative glomerulonephritis lesion                                                                                                                                                                                                              | 0                         |
| 2 | 44/F     | 2007 | NA               | <b>Chagas disease with heart involvement</b><br>Unspecified non-psychotic mental disorder as a result of organic brain damage<br>Other primary cardiomyopathies<br>Unspecified cardiac dysrhythmia<br>Left heart failure<br>Acute pancreatitis<br>Shock without mention of trauma (other)<br>Epigastric abdominal pain<br>Automatic implanted cardiac defibrillator                                                               | 3                         |
| 3 | 61/M     | 2008 | NA               | <b>Primary cardiomyopathy (others)</b><br>Chagas disease without organ involvement<br>Unspecified heart failure<br>Unspecified acute renal failure                                                                                                                                                                                                                                                                                | 8                         |
| 4 | 52/M     | 2009 | NA               | <b>Chagas disease with heart involvement</b><br>Mitral valve disorders<br>Tricuspid valve disorders specified as non-rheumatic<br>Phlebitis and thrombophlebitis from other sites (others)<br>Unspecified pleural effusion<br>Cardiogenic shock<br>Ascites<br>Bacteremia<br>Infectious and inflammatory reaction by devices implants and vascular grafts<br>Hematoma that complicates a procedure.                                | 38                        |
| 5 | 31/M     | 2009 | NA               | <b>Chagas disease with involvement of another organ</b><br>Clostridium difficile infection<br>HIV<br>Cytomegalovirus disease<br>Tobacco use disorder<br>Hemiplegia (affectation of side not specified)<br>Epilepsy (no mention of untreatable epilepsy)<br>Pneumonitis due to inhalation of food or vomit<br>Urinary tract infection (site not specified)<br>Infectious and parasitic diseases (others)<br>Other urinary problems | 65                        |
| 6 | 44/F     | 2010 | NA               | <b>Chagas disease with heart involvement</b><br>Right bundle branch block<br>Complications of transplanted heart<br>Colon diverticulosis with no mention of hemorrhage<br>Chagas disease with involvement of another organ<br>Other specified intestinal disorders (other)<br>Diaphragmatic hernia<br>Unspecified myalgia and myositis<br>Post-operative shock<br>Cardiogenic shock                                               | 2                         |

| N  | Age<br>/Sex | Year | Country<br>of birth | Diagnoses (main diagnosis in bold) <sup>a</sup>                                                                                                                                                                                                                                                                                                                                                                                                                                                                     | Length of<br>admission,<br>days |
|----|-------------|------|---------------------|---------------------------------------------------------------------------------------------------------------------------------------------------------------------------------------------------------------------------------------------------------------------------------------------------------------------------------------------------------------------------------------------------------------------------------------------------------------------------------------------------------------------|---------------------------------|
|    |             |      |                     | SIRS by a non-infectious process with acute organic dysfunction<br>Unspecified acute renal failure<br>Automatic implanted cardiac defibrillator<br>Organ transplant waiting status.                                                                                                                                                                                                                                                                                                                                 |                                 |
| 7  | 65/F        | 2011 | NA                  | <b>Chagas disease with heart involvement</b><br>Other primary myocardiopathies<br>Unspecified congestive heart failure<br>Cardiogenic shock<br>Other unspecified coagulation defects<br>Acidosis<br>Other abnormal glucose<br>Unspecified kidney failure (Unspecified Kidney Failure)<br>Automatic implanted cardiac defibrillator                                                                                                                                                                                  | 14                              |
| 8  | 34/F        | 2012 | NA                  | <b>Cardiogenic shock</b><br>Chagas disease without organ involvement<br>Idiopathic myocarditis<br>Other primary myocardiopathies<br>Pericardial disease not specified.                                                                                                                                                                                                                                                                                                                                              | 0                               |
| 9  | 64/F        | 2012 | NA                  | <b>Unspecified congestive heart failure</b><br>Acute over chronic systolic heart failure<br>Chagas disease with heart involvement<br>Other primary myocardiopathies<br>Unspecified acute renal failure<br>Oliguria and anuria<br>Atrial fibrillation<br>Mitral valve insufficiency and aortic valve insufficiency<br>Diseases of the tricuspid valve<br>Chronic cardiopulmonary disease (others)<br>Unspecified hypothyroidism<br>Stage II chronic nephropathy (mild)<br>Obesity not specified<br>Cardiac pacemaker | 2                               |
| 10 | 47/F        | 2012 | NA                  | <b>Chagas disease with involvement of another organ</b><br>Bleeding that complicates a procedure<br>Dysfunction of the sinoatrial node<br>Cardiac pacemaker<br>Prolonged (current) use of anticoagulants                                                                                                                                                                                                                                                                                                            | 34                              |
| 11 | 55/F        | 2013 | NA                  | <b>Chagas disease with involvement of another organ</b><br>Cardiac arrest<br>Ventricular fibrillation<br>Hypokalemia<br>Cardiomyopathy in other diseases classified under other concepts<br>Unspecified essential hypertension<br>Left heart failure<br>Atrial fibrillation<br>Esophageal reflux<br>Another blocking of the left branch of the booklet<br>Transient ischemic attack (TIA) and cerebral infarction without residual deficit<br>Prolonged (current) use of anticoagulants                             | 15                              |
| 12 | 75/F        | 2013 | NA                  | <b>Chagas disease with heart involvement</b><br>Other primary myocardiopathies<br>Unspecified congestive heart failure                                                                                                                                                                                                                                                                                                                                                                                              | 27                              |

| N  | Age<br>/Sex | Year | Country<br>of birth | Diagnoses (main diagnosis in bold) <sup>a</sup>                                                                                                                                                                                                                                                                                                                                                                                                                                                                                                                                                                                                                                                                                                   | Length of<br>admission, days |
|----|-------------|------|---------------------|---------------------------------------------------------------------------------------------------------------------------------------------------------------------------------------------------------------------------------------------------------------------------------------------------------------------------------------------------------------------------------------------------------------------------------------------------------------------------------------------------------------------------------------------------------------------------------------------------------------------------------------------------------------------------------------------------------------------------------------------------|------------------------------|
|    |             |      |                     | Acute purulent endophthalmitis<br>Hypoosmolality and/or hyponatremia<br>Stage I to stage IV chronic hypertensive kidney disease (unspecified)<br>Chronic nephropathy, not otherwise specified<br>Cardiac pacemaker<br>Prolonged (current) use of anticoagulants                                                                                                                                                                                                                                                                                                                                                                                                                                                                                   |                              |
| 13 | 60/<br>M    | 2013 | NA                  | <b>Congestive heart failure, unspecified</b><br>Acute respiratory failure<br>Chagas disease with heart involvement<br>Automatic implanted cardiac defibrillator<br>Prolonged (current) use of anticoagulants<br>Obesity not specified<br>Unspecified hearing loss<br>Pterygium not specified                                                                                                                                                                                                                                                                                                                                                                                                                                                      | 16                           |
| 14 | 43/F        | 2013 | NA                  | <b>Chagas disease with heart involvement</b><br>Cardiac arrest<br>Anoxic brain damage                                                                                                                                                                                                                                                                                                                                                                                                                                                                                                                                                                                                                                                             | 6                            |
| 15 | 77/<br>M    | 2016 | Peru                | <b>Chagas disease (chronic) affecting the heart</b><br>Ventricular tachycardia<br>Atherosclerotic heart disease of native coronary artery without angina<br>Unspecified left ventricular failure<br>Accidental puncture and tearing of an organ or structure of the circulatory system during a circulatory system procedure<br>Cardiac catheterization as a cause of abnormal patient reaction or subsequent complication with no mention of adverse event at the time of the procedure<br>Post-procedure (acute) (chronic) renal failure                                                                                                                                                                                                        | 17                           |
| 16 | 64          | 2016 | Colombia            | <b>Cardiac arrest, cause not specified</b><br>Chagas disease (chronic) affecting the heart<br>Non-toxic multinodular goiter<br>Hyperlipidemia not specified<br>Epileptic syndrome with absences (not untreatable) without status epilepticus<br>Unspecified encephalopathy<br>Essential (primary) hypertension<br>Paroxysmal atrial fibrillation<br>Unspecified heart failure<br>Venous insufficiency (chronic) (peripheral)<br>Pneumonia (microorganism not specified)<br>Cardiac achalasia<br>Colon diverticulosis without perforation or abscess (no bleeding)<br>Erythema nodosum<br>Primary osteoarthritis of the knee bilateral<br>Spondylosis not specified<br>Stage 5 chronic kidney disease<br>Prolonged (current) use of anticoagulants | 11                           |
| 17 | 56          | 2016 | NA                  | <b>Chagas disease (chronic) affecting the heart</b><br>Cardiomyopathy in diseases classified under another concept<br>Cardiogenic shock<br>Systemic inflammatory response syndrome (SIRS) of non-infectious origin with acute organic dysfunction<br>Unspecified acute renal failure<br>Acute and subacute liver failure without coma                                                                                                                                                                                                                                                                                                                                                                                                             | 49                           |

| N  | Age<br>/Sex | Year | Country<br>of birth | Diagnoses (main diagnosis in bold) <sup>a</sup>                                   | Length of<br>admission, days |
|----|-------------|------|---------------------|-----------------------------------------------------------------------------------|------------------------------|
|    |             |      |                     | Disseminated intravascular coagulation (defibrillation syndrome)                  |                              |
|    |             |      |                     | Diabetes mellitus type 2 without complications                                    |                              |
|    |             |      |                     | Primary essential hypertension                                                    |                              |
| 18 | 51          | 2018 | Bolivia             | <b>Chagas disease with cardiac involvement</b>                                    | 108                          |
|    |             |      |                     | Megacolon in Chagas disease                                                       |                              |
|    |             |      |                     | Mucocutaneous leishmaniasis                                                       |                              |
|    |             |      |                     | Blood group A (Rh positive)                                                       |                              |
|    |             |      |                     | Bleeding from anus and rectum                                                     |                              |
|    |             |      |                     | Other hemorrhoids                                                                 |                              |
|    |             |      |                     | Acute post-hemorrhagic anemia                                                     |                              |
|    |             |      |                     | Personal history of other infectious and parasitic diseases                       |                              |
|    |             |      |                     | Uncomplicated alcohol dependency                                                  |                              |
|    |             |      |                     | Occupational exposure to toxic agents in other industries                         |                              |
|    |             |      |                     | Cushing's syndrome not specified                                                  |                              |
|    |             |      |                     | Lumbago with sciatica (side not specified)                                        |                              |
|    |             |      |                     | Hypokalemia                                                                       |                              |
|    |             |      |                     | Hypoosmolality and hyponatremia                                                   |                              |
|    |             |      |                     | Constipation not specified                                                        |                              |
|    |             |      |                     | Unspecified caloric-protein malnutrition                                          |                              |
|    |             |      |                     | Muscle loss and atrophy not otherwise classified (location not specified)         |                              |
|    |             |      |                     | Adverse effect of antifungal antibiotics used by systemic route (initial contact) |                              |
|    |             |      |                     | Immunodeficiency not specified                                                    |                              |
|    |             |      |                     | Personal history of immunosuppression therapy                                     |                              |
| 19 | 51          | 2018 | Bolivia             | <b>Chagas disease (chronic) affecting the heart</b>                               | 3                            |
|    |             |      |                     | Contact for palliative care                                                       |                              |
|    |             |      |                     | Other type of urinary retention                                                   |                              |
|    |             |      |                     | Unspecified heart failure                                                         |                              |
|    |             |      |                     | Presence of cardiac pacemakers                                                    |                              |
|    |             |      |                     | Atrial fibrillation not specified                                                 |                              |
|    |             |      |                     | Prolonged (current) use of anticoagulants                                         |                              |
| 20 | 63          | 2018 | Spain               | <b>Chagas disease with digestive system involvement, unspecified</b>              | 4                            |
|    |             |      |                     | Chagas disease (chronic) affecting the heart                                      |                              |
|    |             |      |                     | Unspecified caloric-protein malnutrition                                          |                              |
|    |             |      |                     | Muscle loss and atrophy not otherwise classified (location not specified)         |                              |
|    |             |      |                     | Poorly defined and unknown causes of mortality                                    |                              |
|    |             |      |                     | Primary biliary cirrhosis                                                         |                              |
|    |             |      |                     | Polyneuropathies in diseases classified under another concept                     |                              |
|    |             |      |                     | Barrett's esophagus without dysplasia                                             |                              |
|    |             |      |                     | Oropharyngeal phase dysphagia                                                     |                              |
|    |             |      |                     | Autoimmune hepatitis                                                              |                              |
|    |             |      |                     | Fatty liver (fat degeneration) not otherwise classified                           |                              |
|    |             |      |                     | Acquired absence of another (-s) genital organ (-s)                               |                              |
|    |             |      |                     | Acquired absence of both the cervix and the uterus                                |                              |

M: male, F: female, NA: not available; SIRS: Systemic inflammatory response syndrome

<sup>a</sup> The order of secondary diagnosis is the same as recorded in the original database

**Table S4.** Characteristics of included patients whose deaths were not directly attributable to Chagas disease

| N | Age/<br>Sex | Year | Country | Diagnoses (main diagnosis in bold) <sup>a</sup>                                                                                                                                                                                                                                                                                                                                                                                 | Length of<br>admission,<br>days |
|---|-------------|------|---------|---------------------------------------------------------------------------------------------------------------------------------------------------------------------------------------------------------------------------------------------------------------------------------------------------------------------------------------------------------------------------------------------------------------------------------|---------------------------------|
| 1 | 31/<br>M    | 2002 | NA      | <b>Unspecified viral hepatitis without liver coma</b><br>Chagas disease without organ involvement<br>Other primary myocardiopathies<br>First degree atrioventricular block<br>Cardiac pacemaker                                                                                                                                                                                                                                 | 18                              |
| 2 | 82/F        | 2002 | NA      | <b>Bowel obstruction (other)</b><br>Chagas disease without organ involvement<br>Unspecified protein-calorie malnutrition<br>Cachexia                                                                                                                                                                                                                                                                                            | 12                              |
| 3 | 83/<br>M    | 2005 | NA      | <b>Pulmonary embolism and heart attack (other)</b><br>Chagas disease with heart involvement<br>Blocking of the right branch of the booklet<br>Atrial fibrillation<br>Unspecified location ruptured aortic aneurysm<br>Cardiogenic shock                                                                                                                                                                                         | 0                               |
| 4 | 27/<br>M    | 2005 | NA      | <b>Acute myeloid leukemia with no mention of having reached remission</b><br>Chagas disease with involvement of another organ<br>Trypanosomiasis not specified<br>Candidiasis enteritis<br>Encephalitis myelitis and encephalomyelitis in protozoan diseases<br>classified under other concepts<br>Irritable colon<br>Unspecified acute renal failure<br>Diarrhea<br>Hepatomegaly<br>Infectious and parasitic diseases (others) | 49                              |
| 5 | 41/<br>M    | 2007 | NA      | <b>HIV disease</b><br>Septicemia not specified<br>E coli infection<br>Chagas disease without organ involvement<br>Thrush<br>Meningoencephalitis due to toxoplasmosis<br>Volume decrease<br>Unspecified non-infectious gastroenteritis/colitis<br>Septic shock<br>Severe sepsis                                                                                                                                                  | 22                              |
| 6 | 31/F        | 2007 | NA      | <b>Pneumonia</b><br>Mycoplasma infection<br>Chagas disease without organ involvement<br>Other unspecified coagulation defects<br>Unspecified acute pericarditis<br>Acute and subacute liver necrosis<br>Unspecified kidney failure (Unspecified Kidney Failure)<br>Septic shock<br>Non-specific elevation of transaminase or lactodeshydrogenase (LDH)<br>levels                                                                | 7                               |
| 7 | 0/M         | 2007 | NA      | <b>Hypoplastic left heart syndrome</b><br>Chagas disease without organ involvement                                                                                                                                                                                                                                                                                                                                              | 5                               |

| N  | Age/<br>Sex | Year | Country | Diagnoses (main diagnosis in bold) <sup>a</sup>                                                                                                                                                                                                                                                                                                                                                                                                                                                                                         | Length of<br>admission,<br>days |
|----|-------------|------|---------|-----------------------------------------------------------------------------------------------------------------------------------------------------------------------------------------------------------------------------------------------------------------------------------------------------------------------------------------------------------------------------------------------------------------------------------------------------------------------------------------------------------------------------------------|---------------------------------|
|    |             |      |         | Maternal infections                                                                                                                                                                                                                                                                                                                                                                                                                                                                                                                     |                                 |
| 8  | 58/F        | 2008 | NA      | <b>Benign neoplasm of the brain</b><br>Chagas disease without organ involvement<br>Dysphagia                                                                                                                                                                                                                                                                                                                                                                                                                                            | 12                              |
| 9  | 65/F        | 2009 | NA      | <b>Unspecified cerebral artery occlusion with cerebral infarction</b><br>Other staphylococcal sepsis<br>Chagas disease without organ involvement<br>Diabetes mellitus type II without mention of complication<br>Hyperkalemia<br>Quadriplegia and quadriparesis (others)<br>Status of great evil<br>Unspecified essential hypertension<br>Cardiomyopathy in other diseases classified under other concepts<br>Right bundle branch block and left anterior fascicular block<br>Atrial fibrillation<br>Coma<br>Sepsis                     | 9                               |
| 10 | 26/F        | 2009 | NA      | <b>Gallbladder stone with acute cholecystitis no mention of obstruction</b><br>HIV disease<br>Cytomegalovirus disease<br>Chagas disease without organ involvement<br>Anemia not specified<br>Other unspecified coagulation defects<br>Hemoperitoneum (non-traumatic)<br>Liver abscess<br>Other specified liver disorders<br>Other specified disorders of the biliary tract<br>Complications of the digestive system<br>Other interventions and surgical techniques specified<br>Personal history of allergy to another antibiotic agent | 168                             |
| 11 | 32/F        | 2010 | NA      | <b>Cerebral edema</b><br>Congenital factor VIII disorder<br>Non-pyogenic meningitis<br>Chagas disease without organ involvement<br>Personal history of tuberculosis                                                                                                                                                                                                                                                                                                                                                                     | 2                               |
| 12 | 11/F        | 2011 | NA      | <b>Intracerebral hemorrhage</b><br>Other seizures<br>Meningitis not specified<br>Chagas disease without organ involvement<br>Other complications by device implant and graft of the nervous system<br>Surgical intervention with implantation of an artificial internal device<br>Other states after a procedure (other)                                                                                                                                                                                                                | 46                              |
| 13 | 54/F        | 2011 | NA      | <b>Malignant heart neoplasm</b><br>Secondary malignant neoplasm of the pleura<br>Secondary malignant neoplasm from other specified sites (other)<br>Pain (acute/chronic) related to a neoplasm<br>Unspecified acute pericarditis<br>Chagas disease with heart involvement<br>Sicca syndrome<br>Mitral valve disorders<br>Unspecified hypothyroidism<br>Chronic lymphocytic thyroiditis                                                                                                                                                  | 9                               |



| N  | Age/<br>Sex | Year | Country | Diagnoses (main diagnosis in bold) <sup>a</sup>                                                                                                                                                                                                                                                                                                                                                                                                            | Length of<br>admission,<br>days |
|----|-------------|------|---------|------------------------------------------------------------------------------------------------------------------------------------------------------------------------------------------------------------------------------------------------------------------------------------------------------------------------------------------------------------------------------------------------------------------------------------------------------------|---------------------------------|
| 14 | 54/<br>M    | 2011 | NA      | <b>Bronchopneumonia</b><br>Septicemia not specified<br>Severe sepsis<br>Septic shock<br>Unspecified acute renal failure<br>Other symptoms that affect the nervous system and the musculoskeletal system<br>Acute respiratory failure<br>Other sequelae of chronic liver disease<br>Shock not specified<br>Recurrent acute lymphoid leukemia<br>Chagas disease without organ involvement<br>Unspecified essential hypertension<br>Neutropenia not specified | 8                               |
| 15 | 88/<br>M    | 2012 | NA      | <b>Visceral herpes simplex</b><br>Unspecific esophagitis<br>Unspecified gastrointestinal tract bleeding<br>Shock without mention of trauma (other)<br>Chagas disease without organ involvement<br>Ancient myocardial infarction<br>Percutaneous transluminal coronary angioplasty<br>Blood vessel replaced by other means<br>Unspecified hypothyroidism<br>Colostomy<br>Pneumonitis due to inhalation of food or vomit                                     | 11                              |
| 16 | 50/<br>M    | 2012 | NA      | <b>Toxoplasmosis from other specified sites</b><br>Brain compression<br>Chagas disease without organ involvement<br>Unspecified bowel obstruction<br>Pneumonia                                                                                                                                                                                                                                                                                             | 32                              |
| 17 | 39/F        | 2013 | NA      | <b>Pneumonia</b><br>Acute respiratory failure<br>HIV<br>Septicemia<br>Trypanosomiasis not specified<br>Cocaine dependence<br>Protein-calorie malnutrition<br>Cachexia<br>Anemia                                                                                                                                                                                                                                                                            | 1                               |
| 18 | 4/F         | 2013 | NA      | <b>Fever unspecified</b><br>Infantile cerebral palsy not specified<br>Thrombocytopenia not specified<br>Hematemesis<br>Unspecified protein calorie malnutrition<br>Unspecified acute renal failure<br>Dehydration<br>Chagas disease without organ involvement<br>Generalized convulsive epilepsy (no mention of untreatable epilepsy)<br>Open wound of the foot (except toes only) without mention of complication<br>Residential institution              | 14                              |
| 19 | 71/<br>M    | 2014 | NA      | <b>Malignant neoplasm of the brain (other parts of the brain)</b><br>Cellulite/abscess in trunk                                                                                                                                                                                                                                                                                                                                                            | 12                              |

| N  | Age/<br>Sex | Year | Country | Diagnoses (main diagnosis in bold) <sup>a</sup>                                                                                                                                                                                                                                                                                                                                                                                                                                                                            | Length of<br>admission,<br>days |
|----|-------------|------|---------|----------------------------------------------------------------------------------------------------------------------------------------------------------------------------------------------------------------------------------------------------------------------------------------------------------------------------------------------------------------------------------------------------------------------------------------------------------------------------------------------------------------------------|---------------------------------|
|    |             |      |         | Untreated epilepsy not specified<br>Late syphilis not specified<br>Chagas disease without organ involvement<br>Hypertensive heart disease without heart failure<br>Chronic bronchitis not specified<br>Uncomplicated secondary diabetes mellitus<br>Adrenal cortex steroids<br>History of tobacco use<br>Other diseases of the respiratory system not classified under other concepts                                                                                                                                      |                                 |
| 20 | 41/<br>M    | 2014 | NA      | <b>Influenza with pneumonia</b><br>Other pulmonary insufficiencies not otherwise classified<br>Bronchitis not specified as acute or chronic<br>Pseudomonas infection<br>Septicemia by other gram-negative organisms (others)<br>Sepsis<br>Urinary tract infection (site not specified)<br>Klebsiella pneumoniae infection<br>Other tracheostomy complications<br>Other specified cardiac dysrhythmias (other)<br>Chagas disease without organ involvement<br>Diabetes mellitus type II without mention of complication     | 22                              |
| 21 | 58/<br>M    | 2014 | NA      | <b>Other hand and wrist tenosynovitis</b><br>Non-traumatic upper limb compartment syndrome<br>Upper extremity arterial embolism and thrombosis<br>Acute post-hemorrhagic anemia<br>Fever present in diseases classified under other concepts<br>Atrial fibrillation<br>Rhabdomyolysis<br>Chagas disease with involvement of another organ<br>Another sharp pain<br>Unspecified multi-site arthropathy<br>Septicemia not specified<br>Severe sepsis<br>History of tobacco use<br>Prolonged (current) steroid use            | 24                              |
| 22 | 79/<br>M    | 2016 | Bolivia | <b>Other types of bowel obstruction</b><br>Megacolon in Chagas disease<br>Other specified congenital malformations of the intestine<br>Diabetes mellitus type 2 without complications<br>Essential (primary) hypertension<br>Unspecified interstitial lung disease<br>Bronchiectasis without complications<br>Unspecified Alzheimer's disease<br>Dementia in other diseases classified under another concept (without behavioral alteration)<br>Personal history of tuberculosis<br>Personal history of pulmonary embolism | 5                               |
| 23 | 40/F        | 2016 | Bolivia | <b>Rectosigmoid junction malignancy</b><br>Secondary malignant neoplasm of the liver and intrahepatic bile ducts<br>Secondary malignant neoplasm of retroperitoneum and peritoneum<br>Chagas disease (chronic) affecting the heart<br>Unspecified hypothyroidism                                                                                                                                                                                                                                                           | 9                               |

| N  | Age/<br>Sex | Year | Country           | Diagnoses (main diagnosis in bold) <sup>a</sup>                                                                                                                                                                                                                                                                                                                                                                                                                                                                                                                        | Length of<br>admission,<br>days |
|----|-------------|------|-------------------|------------------------------------------------------------------------------------------------------------------------------------------------------------------------------------------------------------------------------------------------------------------------------------------------------------------------------------------------------------------------------------------------------------------------------------------------------------------------------------------------------------------------------------------------------------------------|---------------------------------|
|    |             |      |                   | Problems related to living alone<br>Colostomy status                                                                                                                                                                                                                                                                                                                                                                                                                                                                                                                   |                                 |
| 24 | 65/<br>M    | 2016 | Bolivia           | <b>Bleeding esophageal ulcer</b><br>Pemphigus erythematosus<br>Stage 5 chronic kidney disease<br>Renal dialysis dependency<br>Diabetes mellitus type 2 without complications<br>Prolonged (current) use of insulin<br>Secondary hyperparathyroidism of renal origin<br>Colon diverticulosis without perforation or abscess (no bleeding)<br>Diaphragmatic hernia without obstruction or gangrene<br>Benign prostatic hyperplasia without lower urinary tract symptoms<br>Acute Chagas disease that does not affect the heart                                           | 33                              |
| 25 | 43/<br>M    | 2016 | NA                | <b>Agranulocytosis secondary to antineoplastic chemotherapy</b><br>Hypotension not specified<br>Other complications of bone marrow transplantation<br>Graft-versus-host disease not specified<br>Unspecified erythematous condition<br>Unspecified cytomegalovirus disease<br>Other leukemias specified in recurrence<br>Chagas disease that does not affect the heart<br>Personal history of antineoplastic chemotherapy<br>Personal history of nicotine dependence                                                                                                   | 8                               |
| 26 | 70/<br>M    | 2017 | United<br>Kingdom | <b>Nutritional marasmus</b><br>Stupor<br>Stage IV sacral pressure ulcer<br>Infection with methicillin-resistant <i>Staphylococcus aureus</i> as a cause of<br>diseases classified under another concept<br>Stage IV left buttock pressure ulcer<br>Left hip pressure ulcer stage III<br>Stage III right ankle pressure ulcer<br>Neglect or abandonment of adults (confirmed) initial contact<br>Acute Chagas disease with cardiac involvement<br>Unspecified iron deficiency anemia<br>Unspecified dementia without altered behavior<br>State of allergy to penicillin | 51                              |
| 27 | 90/<br>M    | 2017 | NA                | <b>Mane</b><br>Hematemesis<br>Liver failure (not specified) without a coma<br>Thrombosis of the portal vein<br>Liver cell carcinoma<br>Chagas disease (chronic) affecting the heart<br>Essential (primary) hypertension<br>Diabetes mellitus type 2 without complications<br>Portal hypertension<br>Acute post-hemorrhagic anemia<br>Stage II left buttock pressure ulcer<br>Stage I right heel pressure ulcer<br>Stage I left heel pressure ulcer                                                                                                                     | 1                               |

| N  | Age/<br>Sex | Year | Country | Diagnoses (main diagnosis in bold) <sup>a</sup>                                                                                                                                                                                                                                                                                                                                                                                                                                                                                                                                                                                 | Length of<br>admission,<br>days |
|----|-------------|------|---------|---------------------------------------------------------------------------------------------------------------------------------------------------------------------------------------------------------------------------------------------------------------------------------------------------------------------------------------------------------------------------------------------------------------------------------------------------------------------------------------------------------------------------------------------------------------------------------------------------------------------------------|---------------------------------|
| 28 | 76/<br>M    | 2017 | Spain   | <b>Cerebral infarction due to unspecified occlusion or stenosis of the left middle cerebral artery</b><br>Benign intracranial hypertension<br>Pneumonia due to unspecified microorganisms<br>Viral Hepatitis B unspecified without a hepatic coma<br>Chagas disease (chronic) affecting the heart<br>Chronic obstructive pulmonary disease with exacerbation (acute)<br>Essential (primary) hypertension<br>Nicotine (cigarette) dependence without complications<br>Ancient myocardial infarction<br>Presence of angioplasty grafts and coronary prosthesis<br>Prolonged (current) use of aspirin<br>State of narcotic allergy | 3                               |
| 29 | 51/<br>M    | 2017 | Bolivia | <b>Malignant neoplasm of the brain except lobes and ventricles</b><br>Sepsis (microorganism not specified)<br>Urinary tract infection (location not specified)<br>Contact for palliative care<br>Other specified respiratory disorders<br>Other specified post-procedure states<br>Personal history of nicotine dependence<br>Chagas disease (chronic) affecting the heart                                                                                                                                                                                                                                                      | 20                              |
| 30 | 69/F        | 2017 | Brazil  | <b>Acute myocardial infarction with ST elevation of unspecified location</b><br>Essential (primary) hypertension<br>Hyperlipidemia not specified<br>Unspecified cardiomyopathy<br>Presence of automatic (implantable) cardiac defibrillator<br>Persistent atrial fibrillation<br>Cardiogenic shock<br>Ventricular fibrillation<br>Chagas disease (chronic) affecting the heart<br>Other specified non-inflammatory vaginal disorders                                                                                                                                                                                            | 4                               |
| 31 | 86/F        | 2018 | Spain   | <b>Acute bronchitis unspecified</b><br>Handset flutter not specified<br>Chronic atrial fibrillation<br>Unspecified iron deficiency anemia<br>Rheumatic mitral stenosis with insufficiency<br>Chagas disease (chronic) affecting the heart<br>Personal history of pulmonary embolism<br>Colon diverticulosis without perforation or abscess (no bleeding)<br>Diaphragmatic hernia without obstruction or gangrene<br>Unspecified hypothyroidism<br>Widespread primary osteoarthritis<br>Mild cognitive impairment<br>Wheelchair dependency                                                                                       | 3                               |
| 32 | 85/<br>M    | 2018 | Bolivia | <b>Pneumonitis due to food inhalation and vomiting</b><br>Acute respiratory failure not specified if with hypoxia or hypercapnia<br>Chagas disease (chronic) affecting the heart<br>Unspecified Alzheimer's disease<br>Dementia in other diseases classified under another concept without altering behavior<br>Epilepsy and other generalized (non-intractable) epileptic syndromes without status epilepticus<br>Hyperlipidemia not specified                                                                                                                                                                                 | 6                               |

| N  | Age/<br>Sex | Year | Country | Diagnoses (main diagnosis in bold) <sup>a</sup>                                                                                                                                                                                                                                                                                                                                                                                                                                                                                                                                                                                                                                                           | Length of<br>admission,<br>days |
|----|-------------|------|---------|-----------------------------------------------------------------------------------------------------------------------------------------------------------------------------------------------------------------------------------------------------------------------------------------------------------------------------------------------------------------------------------------------------------------------------------------------------------------------------------------------------------------------------------------------------------------------------------------------------------------------------------------------------------------------------------------------------------|---------------------------------|
|    |             |      |         | Nicotine (cigarette) dependence without complications<br>Prolonged (current) use of aspirin                                                                                                                                                                                                                                                                                                                                                                                                                                                                                                                                                                                                               |                                 |
| 33 | 52/<br>M    | 2018 | Bolivia | <b>Rectosigmoid junction malignancy</b><br>Secondary malignant neoplasm of retroperitoneum and peritoneum<br>Unspecified inflammatory prostate disease<br>Erectile dysfunction due to other diseases classified under another concept<br>Personal history of nicotine dependence<br>Alcohol dependency in remission<br>Cocaine dependence in remission<br>Chagas disease with unspecified digestive system involvement<br>Unspecified esophagitis<br>Diaphragmatic hernia without obstruction or gangrene<br>Personal history of other infectious and parasitic diseases                                                                                                                                  | 45                              |
| 34 | 62/F        | 2018 | Bolivia | <b>Malignant neoplasm of the ascending colon</b><br>Other specified functional bowel disorders<br>Adverse effect of unspecified narcotics (initial contact)<br>Pain (acute) (chronic) related to neoplasia<br>Secondary malignant neoplasm of retroperitoneum and peritoneum<br>Secondary malignant neoplasm of the liver and intrahepatic bile ducts<br>Contact for palliative care<br>Cachexia<br>First degree hemorrhoids<br>Unspecified chronic gastritis without bleeding<br>Chagas disease (chronic) affecting the heart                                                                                                                                                                            | 5                               |
| 35 | 36/F        | 2018 | Uruguay | <b>Agranulocytosis secondary to antineoplastic chemotherapy</b><br>Adverse effect of antineoplastic and immunosuppressive drugs (initial contact)<br>Thrombocytopenia not specified<br>Unspecified oral mucositis (ulcer)<br>Unspecified acute renal failure<br>Malignant neoplasm of the rectum<br>Secondary malignant neoplasm of the brain<br>Secondary malignant neoplasm of retroperitoneum and peritoneum<br>Secondary malignant neoplasm of the right lung<br>Secondary malignant neoplasm of the left lung<br>Secondary malignant neoplasm of the liver and intrahepatic bile ducts<br>Secondary malignant neoplasm of the right adrenal gland<br>Chagas disease (chronic) affecting other organs | 3                               |
| 36 | 73/<br>M    | 2018 | Ecuador | <b>Sepsis by gram negatives no specified</b><br>Severe sepsis with septic shock<br>Unspecified infectious gastroenteritis and colitis<br>Unspecified acute renal failure<br>Liver failure (not specified) without a coma<br>Acidosis<br>Unspecified coagulation defect<br>Hypertensive chronic kidney disease with stage 1 to 4 chronic kidney disease or unspecified chronic kidney disease<br>Stage 3 chronic kidney disease (moderate)<br>Diabetes mellitus type 2 without complications<br>Hyperlipidemia not specified<br>Obesity not specified<br>Gallbladder stone without cholecystitis without obstruction                                                                                       | 1                               |

|   |             |      |         |                                                 | Length of admission, days |
|---|-------------|------|---------|-------------------------------------------------|---------------------------|
| N | Age/<br>Sex | Year | Country | Diagnoses (main diagnosis in bold) <sup>a</sup> |                           |
|   |             |      |         | Dilated cardiomyopathy                          |                           |
|   |             |      |         | Chagas disease (chronic) affecting the heart    |                           |
|   |             |      |         | Non-rheumatic mitral (valve) insufficiency      |                           |
|   |             |      |         | Non-rheumatic tricuspid (valve) insufficiency   |                           |
|   |             |      |         | Chronic atrial fibrillation                     |                           |
|   |             |      |         | Presence of cardiac pacemakers                  |                           |
|   |             |      |         | Prolonged (current) use of anticoagulants       |                           |

F: female M: male; NA: not available.  
<sup>a</sup> The order of secondary diagnosis is the same as recorded in an original database
